# Supplementary material for: Naturally acquired humoral and cellular immune responses to Plasmodium vivax merozoite surface protein 8 in patients with P. vivax infection
Source: Springer Nature journal article supplement (doi:10.1186/s12936-017-1837-5), 2017-05-22
Supplement: MOESM1 [file 12305294]

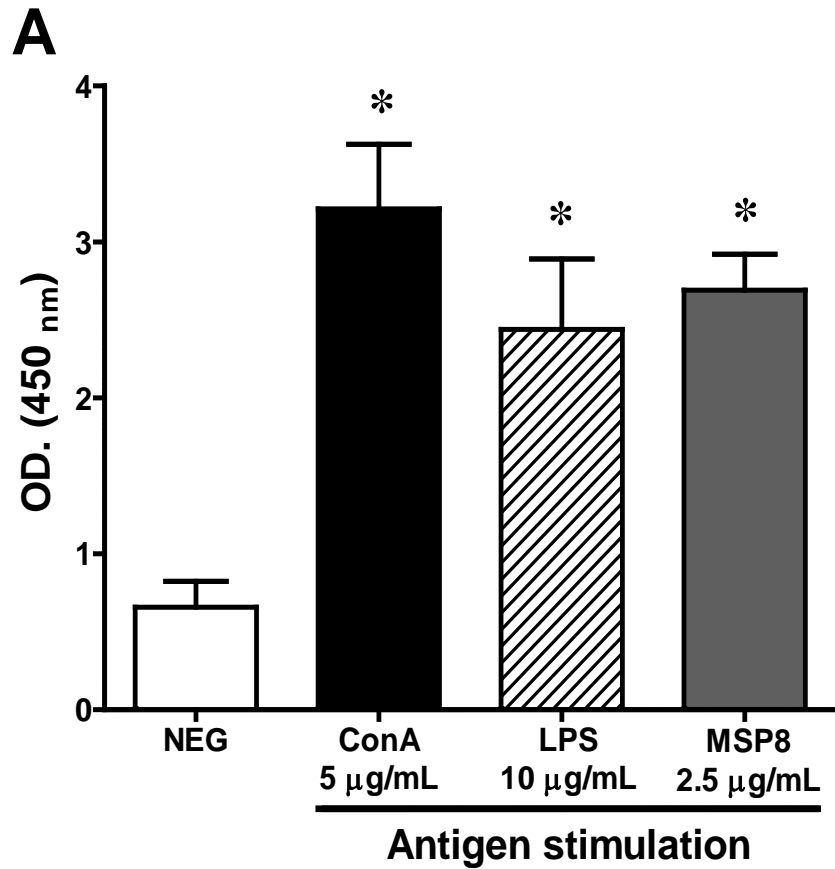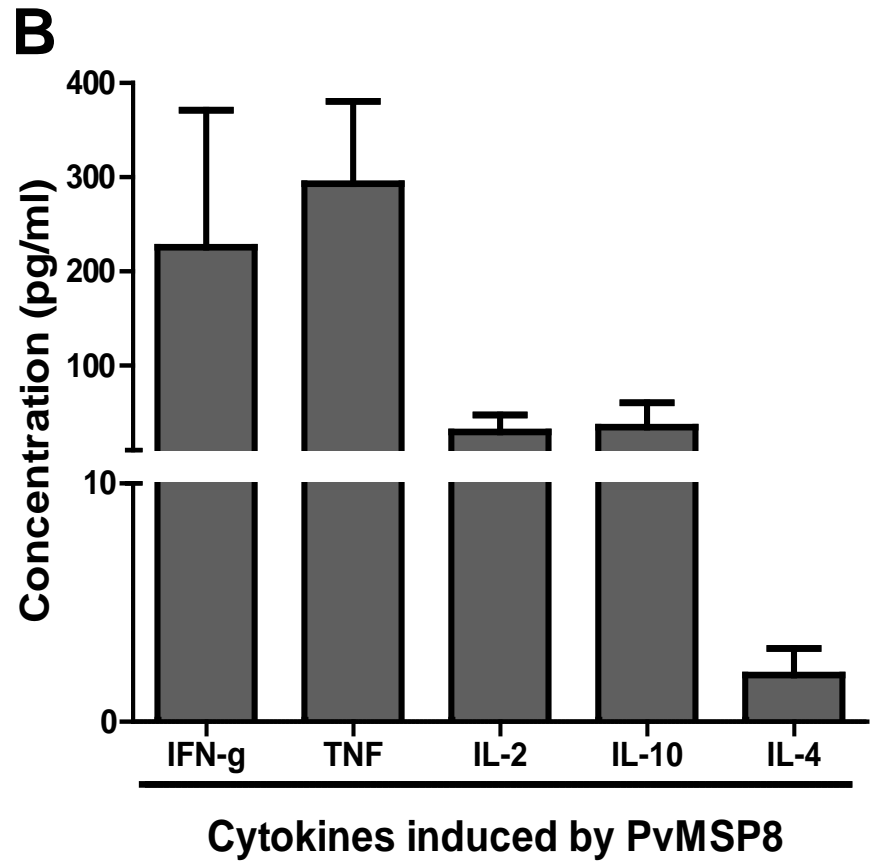

Suppl. Fig. 1

**Table S1.** Peptide sequence information of overlapped 18-mers from the PvMSP8 C terminus

| No. peptide | Peptide sequence    | Peptide location in full length of PvMSP8 (Sal-1) |
|-------------|---------------------|---------------------------------------------------|
| 1           | EKINEHFIKDDSFDSLSDY | 258–275                                           |
| 2           | DDSFDSLSDYLADFELINY | 267–284                                           |
| 3           | LADFELINYIIMHETSEL  | 276–293                                           |
| 4           | IIMHETSELIDELLNIE   | 285–302                                           |
| 5           | IDELLNIESMNFRLSE    | 294–311                                           |
| 6           | SMNFRLSEGSLEKMKVSA  | 303–320                                           |
| 7           | SLEKMKVSAESGMNLNCK  | 312–329                                           |
| 8           | ESGMNLNCKMKEDIIHLL  | 321–338                                           |
| 9           | MKEDIIHLLKSSAKFFK   | 330–347                                           |
| 10          | KKSSAKFFKIEIDRKTGM  | 339–356                                           |
| 11          | IEIDRKTGMIPVQATHK   | 348–365                                           |
| 12          | IYPVQATHKGANMKQLAL  | 357–374                                           |
| 13          | GANMKQLALSFLQKNNVC  | 366–383                                           |
| 14          | SFLQKNNVCEHKKCPLNS  | 375–392                                           |
| 15          | EHKKCPLNSNCYVINGEE  | 384–401                                           |
| 16          | NCYVINGEEVCRCLPGFS  | 393–410                                           |
| 17          | VCRCLPGFSDVKIDNVMN  | 402–419                                           |
| 18          | DVKIDNVMNCVRDDTLDC  | 411–428                                           |
| 19          | CVRDDTLDCSNNNGGCDV  | 420–437                                           |
| 20          | SNNNGGCDVNATCTLIDK  | 429–446                                           |
| 21          | NATCTLIDKKIVCECKDN  | 438–455                                           |
| 22          | KIVCECKDNFEGDGIYCS  | 447–464                                           |

**Table S2.** Prevalence (% positive), 95% confidence intervals, and mean fluorescence intensity of IgG responses to rPvMSP8 in patient and healthy individual serum samples

| Protein | No. of patients samples ( <i>n</i> ) |          |            | 95%CI (%) | MFI    | No. of healthy samples ( <i>n</i> ) |          |           | 95% CI (%) | MFI   | <i>P</i> value |
|---------|--------------------------------------|----------|------------|-----------|--------|-------------------------------------|----------|-----------|------------|-------|----------------|
|         | Positive                             | Negative | Total (%)  |           |        | Positive                            | Negative | Total (%) |            |       |                |
| MSP8    | 82                                   | 30       | 112 (73.2) | 64.3-80.6 | 17,867 | 3                                   | 77       | 80(3.8)   | 89.6-98.7  | 1,363 | < 0.0001       |

Abbreviations: MFI, mean fluorescence intensity; CI, confidence interval.

**Table S3.** Prevalence, 95% confidence intervals, and normalized mean fluorescence intensity of IgG responses to rPvMSP8 in 1-month follow-up and archival sera samples

| Samples ( <i>n</i> ) | No. of samples |          | Sensitivity (%) | Specificity (%) | 95% CI (%) | Normalized MFI $\pm$ SD <sup>a</sup> | <i>P</i> value <sup>b</sup> |
|----------------------|----------------|----------|-----------------|-----------------|------------|--------------------------------------|-----------------------------|
|                      | Positive       | Negative |                 |                 |            |                                      |                             |
| Acute patients (25)  | 21             | 4        | 84.0            |                 | 65.4-93.6  | 7.46 $\pm$ 1.19                      | < 0.0001                    |
| Day 7 (25)           | 25             | 0        | 100.0           |                 | 86.7-100.0 | 8.91 $\pm$ 1.31                      | < 0.0001                    |
| Day 14 (25)          | 24             | 1        | 96.0            |                 | 80.5-99.3  | 8.00 $\pm$ 1.08                      | < 0.0001                    |
| Day 21 (25)          | 23             | 2        | 92.0            |                 | 75.0-97.8  | 6.84 $\pm$ 1.08                      | < 0.0001                    |
| Day 28 (25)          | 23             | 2        | 92.0            |                 | 75.0-97.8  | 5.99 $\pm$ 0.94                      | < 0.0001                    |
| 5 year (30)          | 17             | 13       | 56.7            |                 | 39.2-72.6  | 1.582 $\pm$ 0.21                     | < 0.0001                    |
| 10 year (30)         | 10             | 20       | 33.3            |                 | 19.2-51.2  | 0.86 $\pm$ 0.08                      | 0.002                       |
| 30 year (30)         | 7              | 23       | 23.3            |                 | 11.8-40.9  | 0.70 $\pm$ 0.07                      | 0.144                       |
| Healthy (30)         | 0              | 30       |                 | 100.0           | 88.7-100.0 | 0.58 $\pm$ 0.04                      |                             |

Abbreviations: CI, confidence interval; SD, standard deviation.

<sup>a</sup> Normalized MFI, fluorescence intensities divided by each cutoff value (2 standard deviations above the mean fluorescence intensity of the malaria-naive samples).

<sup>b</sup> Differences in the total IgG level for each antigen between vivax malaria patients and healthy individuals were calculated with the Mann-Whitney *U* test. A *P* value of  $\leq 0.05$  was considered statistically significant.
